# Supplementary material for: Volatile Compounds Emitted from the Cat Urine Contaminated Carpet Before and After Treatment with Marketed Cleaning Products: A Simultaneous Chemical and Sensory Analysis
Source: Preprints.org preprint supplement (doi:10.20944/preprints202008.0297.v1), 2020-08-13
Supplement: Supplementary file 1 [file supplementary]

## Sheet: Table S1
Table S1: Summary of volatiles emitted on day zero from Carpet+Subflooring, carpet+subflooring+water, Carpet+subflooring+water+M. Luteus, Carpet+subflooring+caturine, and Carpet+subflooring+caturine+M. Luteus.
	#	Volatile compounds	GC column Retention time (min)	MS Spectral Library (NIST & WILEY 7) match %	Odor published/recorded	CAS #	Carpet+ subflooring (day0)	Carpet+subflooring+water (day0)	Carpet+sub-flooring+water+M. luteus (day0)	Carpet+subflooring+ cat urine (day0)	Carpet+sub-flooring+ cat urine+M. luteus (day0)	Ion (% relative intensity)
							MS Detector response, peak area counts (PACs), arbitrary units
	1	2- Pentanone	5.39	74		107-87-9			178878			43(100), 86(35), 71(15), 58(10)
	2	Pentanal	5.55	85	Fruity, berry	110-62-3	1353390	2092914	453059	1411250	932775	44(100), 41(60), 58(50), 57(40), 43(30)
	3	Octane	6.74	86	alkane	111-65-9	80360	343847		287855	245386	43(100), 85(80), 41(70), 57(50), 71(45)
	4	Toluene	7.11	88		108-88-3	390976	573315		678603	249961	91(100), 92(60), 65(10), 51(5)
	5	Hexanal	8.06	95	Green, leafy, fruity	66-25-1	20876330	36530640	12196949	29052691	22302835	56(100), 41(95), 44(90),57(70), 43(60), 39(40)
	6	Cyclopropane, 1,2 dimethyl	8.83	63		2511-95-7	167106				441161	55(100), 70(90), 42(80), 41(50), 39(30), 43(20)
	7	1-Pentanol	9.37	76	Sweet, balsam	71-41-0	1973782	5537880	3520261	4733304	4656524	55(100), 42(80), 41(75), 70(70), 39(35), 57(30)
	8	1,2-dimethyl cyclohexane	9.85	50		2207-01-04				1120465	326959	97(100), 41(80), 81(70), 55(70), 70(65), 39(50), 69(40)
	9	2,4-Octadienal	10.23	54	Green, fruity	30361-28-5	429872	1777135		1721952	273430	81(100), 69(35), 124(25), 53(20)
	10	2- Heptanone	10.54	79	Cheesy, banana, woody	110-43-0	1714716	3091780	2777763	3923538	2256583	43(100), 58(75), 71(15), 114(10)
	11	1,5,8-triene p-Mentha	10.82	42	roasted	21195-59-5	9665111	32947411	38148205	34872658	33253410	119(100), 93(90), 91(70), 92(40), 134(30)
	12	Styrene	11.24	94	Sweet, balsam, floral, plastic	100-42-5	606000		389091	602067		104(100), 103(40), 78(40), 77(20), 51(15)
	13	Camphene	11.41	93	woody	79-92-5	227234	969090	1128690	739045	1317667	93(100), 121(80), 91(40), 79(35), 67(30), 136(20)
	14	5,7-Dimethylene-Bicyclo [2.2.2] Oct-2-ene	11.71	71		0-00-0	543294	1180010	2769335	1858059	2939182	91(100), 92(50), 117(40), 132(40), 39(30)
	15	Oxirane, 1methyl butyl	11.83	68		53229-39-3	226256	534130	4429689	850678	836812	56(100), 55(70), 41(65), 43(50), 69(40)
	16	β-Pinene	12.26	91	herbal	127-91-3	1687937	7851908	11567116	9308650	9456500	93(100), 91(40), 119(30), 69(25), 41(25)
	17	Cymene	12.34	81		25155-15-1	221329	583992	481057	784909	560977	119(100), 91(30), 134(20), 117(20)
	18	Acetic acid	12.43	72	Sour, pungent	64-19-7	186779	184106	455926	260374	303606	41(100), 43(90), 60(80), 42(20)
	19	β-Myrcene	12.57	75	Woody, fruity, mango	123-35-3					324052	93(100), 69(65), 41(60), 91(40),39(25), 77(20)
	20	2-Pentyl Furan	12.92	92	Green, earthy, fruity	3777-69-3	8548460	25157002	8094707	38127041	10411076	81(100), 82(25), 138(20), 53(20
	21	2-Heptenal	13.04	84		57266-86-1	4937874	10493827	6356121	9629007	2338935	83(100), 55(80), 57(75), 56(70), 70(50), 43(45)
	22	Delta.3-Carene	13.07	79	Sweet	13466-78-9	730841	4804830	3452346	3413761	5487580	93(100), 119(60), 91(60), 77(30), 92(30)
	23	2-Furancarboxaldehyde	13.18	93	Sweet, caramel, woody	98-01-1	2729163	10261585	20835730	9552834	7284509	96(100), 95(95), 39(40), 38(15), 37(10), 67(5)
	24	Octanal	13.58	93	Fatty, orange, citrus	124-13-0	6214209	9639309	14745658	10852307	5457618	43(100), 44(80), 57(75), 56(73), 41(70), 84(60)
	25	β-Terpinyl acetate	13.74	63		10198-23-9	2150947	10442021	5793177	5981307	10438600	68(100), 93(90), 79(40), 107(30), 121(30), 136(30)
	26	p-Cymene	13.96	94	Terpenic, woody	99-87-6	2313165	9444036	9541092	7177474	9693243	119(100), 134(30), 91(20), 117(15)
	27	Cyclopropane,1-methyl-2octyl-cis	14.28	74		77422-52-7	1405234				892623	70(100), 41(95), 54(95), 55(95), 69(70)
	28	2-Octene-1-ol, (E)-	14.3	83	Fatty, green	18409-17-1	8633436	18980208	22311140	25842107	5458593	57(100), 54(61), 67 (56), 41 (53), 55(43),
	29	Cyclopentene, 1-isopropyl-2-3 dimethyl	14.64	54		7712-73-4					218836	95(100), 123(70), 40(40), 67(35), 138(30), 105(30)
	30	Undecane, 5-methyl-	14.84	75		1632-70-8	499713					43(100), 57(95), 71(95), 85(55), 41(40), 55(40)
	31	3 Hepten-2-ol, (E)-	14.88	81		67077-39-8			1035758			81(100), 54(95), 67(80), 41(80), 58(75), 96(70)
	32	3-Octen-2one, (E)-	15.02	76		18402-82-9			2492105	4271524	1049739	55(100), 43(50), 81(50), 111(50), 69(30), 95(30)
	33	1,3-Hexadiene, 3-ethyl-2-methyl-	15.1	68		61142-36-7	712440	1240392	1197070	2213501	973603	67(100), 95(60), 124(40), 109(30), 55(20), 41(20)
	34	Benzaldehyde	15.19	93		100-52-7			457062	798678	815712	106(100), 105(98), 77(80), 51(30), 78(15),50(15)
	35	4-Ethylcyclohexane	15.42	68		3742-42-5			1386981	1254623	588157	81(100), 41(50), 57(45), 55(30), 67(30), 110(30), 95(25)
	36	2-Octenal	15.58	90	Sweet, green	2548-87-0	11490873	26741334	19184953	28832149	8287332	55(100), 70(99), 41(90), 83(80), 57(60)
	37	5-Methyl-2 furfural	15.73	63	Caramellic, sweet	620-02-0					313211	110(100), 109(85), 53(30), 34(5)
	38	2-Nonanone	15.82	75	fruity	821-55-6	464295	760226	1670580	1220985	525839	58(100), 43(85), 59(30), 71(25), 95(10), 84(10), 142(5)
	39	1-Ethyl cyclohexene	16.12	54		1453-24-3				2512032		81(100), 95(35), 69(30), 67(25), 41(25), 55(25),110(20),
	40	Nonanal	16.15	93	Waxy, fresh lemon	124-19-6	8108658	19713902	25439313	8336579	5455640	57(100), 41(75), 43(60), 56(60), 55(55), 98(40)
	41	3-Heptyne, 5-methyl	16.28	74		61228-09-9				1783895	826653	81(100), 110(30), 95(30), 55(25), 67(20), 69(15)
	42	1-Octanol	16.61	79	Citrus, green	111-87-5	1364915	2178387	3871375	4966681	1283026	55(100), 56(90), 41(85), 70(65), 69(65), 84(50)
	43	5-Dodecyne	17.12	68		19780-12-2			2190023	1723338	642288	67(100), 54(95), 81(90), 41(80), 110(70), 119(50)
	44	α-Pinene oxide	17.24	83		1686-14-2	1415693	6868244			2873315	108(100), 93(70), 95(35), 91(30), 67(25)
	45	Campholenal	17.25	86	herbal	4501-58-0			9667511	3753614	2873315	108(100), 93(75), 41(30),67(20)
	46	3-Nonen-2-one	17.44	69	Fruity	14309-57-0	618830	1954903	1863799	3015343	668063	55(100), 43(60), 125(55), 97(30), 82(15)
	47	p-Cymene	17.55	71	Gasoline, citrus	99-87-6	287091	627378	666871	1713562	950795	119(100), 91(35), 134(30), 117(20), 77(10)
	48	2-Methyl 3-octanone	17.7	50		923-28-4				3686800	1558547	43(100), 99(50), 71(40), 81(30), 41(30), 55(25)
	49	Camphor	17.92	93	Camphoreous	464-48-2	161008	882585	1128845	764432	489260	95(100), 81(90), 108(40), 152(35), 55(30), 69(30)
	50	2-Nonenal	17.99	91	Fatty, citrus	18829-56-6			803102		164490	43(100), 70(90), 41(85), 55(80), 83(65), 39(55), 96(40)
	51	Trans-2-Dodecenal	18.01	81	Greent, fat, sweet	81149-96-4				861702		70(100), 41(99), 55(95), 43(85),83(70), 39(60)
	52	3-Pinanone	18.12	95	spicy	547-60-4	168188	903043	1554718	857886	868949	83(100), 55(75), 69(70), 41(40), 95(20), 152(15)
	53	2(10)-Pinen-3-one	18.46	93	Minty	30460-92-5	148369	900211	1536516	756298	882548	81(100), 53(90), 108(85), 41(55), 107(50), 79(50)
	54	Decanal	18.53	88	Soap, orange peel	112-31-2	459369	1372467	1775805	1514576	385111	57(100), 43(90), 55(80), 41(70), 70(60), 82(50)
	55	Carveol	18.65	80	Fresh, spearmint	99-48-9	1165252	3108398	4775435	3122399	3680774	91(100), 119(80), 92(50), 117(40), 134(40), 77(30)
	56	m-Cymene	18.79	55		535-77-3			997564	620562	202417	119(100), 93(60), 91(45), 134(30), 71(15)
	57	p-Cymene	18.85	74	Gasoline, citrus	99-87-6	1953641	3130759	7681896	3639453	2834725	119(100), 91(60), 134(30), 117(20), 77(15)
	58	Myrtenal	19.39	81	Minty, spice	18486-69-6	1470635	1945293	4099242	2393973	1521166	79(100), 107(80), 91(60), 77(55), 105(50), 41(30)
	59	Borneol L	19.46	68	Balsamic, camphor	464-45-9		388859	278312	174591	267262	95(100), 93(50), 212(25), 110(20), 136(15)
	60	Methyl chavicol	19.55	86	Herbal, weedy, phenolic	140-67-0		1199909	1230203	1109720	715997	60(100), 148(80), 73(50), 117(30), 121(25), 133(15)
	61	Hexanoic acid	19.58	63	Fatty, cheesy	142-62-1	1292300		266233			60(100), 73(50), 41(30), 43(25), 87(20)
	62	Terpinyl ester of isobutanoic acid	19.63	81	Floral	7774-65-4		4418171	1666210	1380574	1784542	93(100), 119(60), 68(50), 121 (50), 136(50), 91(40)
	63	6-Undecanone	19.75	74		927-49-1	203106	638505	731090	899183	295056	71(100), 43(98), 99(90), 58(85), 85(25)
	64	Amyl hexoate	19.96	83	Fruity	540-07-8		205258	445197	374627	208176	70(100), 117(95), 43(85), 99(85), 55(50), 71(40), 42(40)
	65	2,4-Nonadienal	20.03	85	Green, cucumber	6750-03-04		306375	655052	481917	188206	81(100), 67(20), 91(20), 39(15), 138(15), 54(10)
	66	2-Pinen-4-one	20.14	77	Camphor, menthol, woody	80-57-9	2359098	4271485	9555286	5829822	2801526	107(100), 135(80), 91(70),150(55)
	67	2-Decenal	20.28	88	Fatty, earthy	3913-81-3	558199	669737	1460373	1120506	182916	70(100), 43(95), 41(90), 55(90), 83(70)
	68	p-Acetyl toluene	20.35	86	Floral, vanilla	122-00-9		214590	313927	346595	81014	119(100), 91(65), 134(35), 65(15)
	69	Carvyl acetate	20.49	54	Minty	97-42-7	718014	1215271	2524389	1786679	844145	91(100), 119(80), 79(60), 105(40), 133(40)
	70	γ-Terpinene	20.41	64	Terpenic, tropical fruity	99-85-4					149271	93(100), 119(80), 91(60), 121(60), 136(40), 134(30)
	71	Carvol	20.76	76	Minty	99-49-0		455923	813890	714193	245077	82(100), 93(40), 108(30), 54(40), 91(25), 132(25)
	72	o-Allyltoluene	20.87	85		1587-04-8		242664	510524	440828	214638	132(100), 117(80), 115(50), 91(40), 43(20), 131(20)
	73	Carveol	21.07	78	Fresh, spearmint	99-48-9	537106	777438	1726391	1242783	570681	91(100), 119(80),117(45), 132(40), 92(40), 77(30)
	74	2,4-Decadienal	21.5	71	Fried, fatty	25152-83-4		724716	545251	402325	234265	81(100), 55(40), 41(40), 67(30), 95(25), 152(20)
	75	Tetradecane	21.69	76		629-59-4	69543	207797		326997	160407	57(100), 43(98), 71(70), 85(45), 41(40), 55(35)
	76	Phenol	21.89	91	Phenol, medicicnal	108-95-2		2087941	2624929	2747043	1052972	94(100), 66(30), 65(25), 55(10)
	77	2 Butyl 2-octenal	22.1	94		13019-16-4				150944		41(100), 55(98), 111(70), 83(70), 95(65), 139(60), 182(55)
	78	2,4-Decadienal	22.16	88	Fatty, fried	25152-84-5	1151085	3595208	3403007	1918567	530572	81(100), 41(30), 67(20), 95(20), 55(15)
	79	2-Undecenal	22.42	75	Fruity	2463-77-6	152277	245584		295077		70(100), 57(80), 41(75), 55(70), 83(60), 69(55)
	80	2-Docecen-1-Al	22.42	74	Herbal, fruity	4826-62-4			375653			70(100), 41 (85), 55(80), 57(70), 43 (70), 83(60), 69(50)
	81	Benzothiazole	22.56	85	Meaty, beefy, rubber	95-16-9	98658	93832		1193130	1789707	135(100), 108(35), 69(15), 82(10), 97(5)
	82	Junipene	22.84	98	woody	475-20-7	440093	1492127	1154475	1695653		161(100), 91(80), 105(70), 189(50), 119(50)
	83	Octadecane	23.67	91		593-45-3			695774	221237		57(100), 71(60), 43(60), 82(55), 85(45), 97(45), 109(40)
	84	5-Pentyl-2[5H]-furanone	24.57	75		0-00-0	194552	609548	929195	646823	228038	84(100), 43(80), 55(75), 125(50), 97(25)
	85	1-Tetradecanol	24.88	94	Waxy, coconut	112-72-1	3087795	8917609	3525090	3860620	4127430	55(100), 69(80), 41(75), 56(70), 83(50), 57(50)
	86	Hexadecane	25.55	91		544-76-3	132867	254428				57(100), 43(70), 71(65), 85(50), 41(35), 55(30)
	87	Eicosane	27.33	79		112-95-8					124809	57(100), 43(70), 71(65), 41(50), 85(40), 69(30)
	88	α-Cedrene	27.98	91		469-61-4	329686		120749			119(100), 93(45), 161(40), 105(30), 41(30), 204(25)
	89	Carbamic acid, N-phenyl-, 1-methyl-1-(4-methylcyclohex-3-enyl)ethyl ester	28.51	68		1224-46-0			798210			81(100), 44(70), 137(65), 93(60), 121(39)
	90	Tridecene	28.52	69		2437-56-1	112850				531700	55(100), 69(80), 41(70), 83(65), 97(50), 70(50)
	91	Ethyl phthalate	28.99	79		84-66-2	82537					149(100), 57(40), 104(30), 177(30), 71(25)
	http://www.thegoodscentscompany.com/ & https://www.flavornet.org/

## Sheet: Table S2
Table S2: Summary of volatiles emitted on day fifteen from Carpet+Subflooring, carpet+subflooring+water, Carpet+subflooring+caturine, and Carpet+subflooring+caturine+M. Luteus.
	#	volatile compounds	GC column Retention time (min)	MS Spectral Library (NIST & WILEY 7) match %	*Odor recorded/published	CAS #	Carpet+ sub-flooring (day 15)	Carpet+sub-flooring+water+ M. luteus (day 15)	Carpet+ sub-flooring+ cat urine (day 15)	Carpet+sub-flooring+ cat urine+M. luteus (day15)	Ion (% relative intensity)
							MS Detector response, peak area counts (PACs), arbitrary units
	1	Acetone	3.19	68		67-64-1	152540			147139	43(100), 58(30), 42(10), 39(5)
	2	Acetic acid methyl ester	3.33	63	Sweet. fruity	79-20-9			1499733		43(100), 74(35), 59(15), 42(10)
	3	2- Pentanone	5.39	72		107-87-9	1704070			241509	43(100), 86(35), 71(15), 58(10)
	4	Octane	6.74	75		111-65-9	338270	750351			43(100), 85(80), 41(70), 57(50), 71(45)
	5	Toluene	7.11	81		108-88-3	464988			465549	91(100), 92(60), 65(10), 51(5)
	6	2-Hexanone	7.81	74		591-78-6	380781				43(100), 58(60), 100(20), 57(20), 85(15), 71(10)
	7	1-Pentanol	9.37	76	Balsamic, sweet	71-41-0			3766579		55(100), 42(80), 41(75), 70(70), 39(35), 57(30)
	8	2-Methyl pyrazine	10.03	79		109-08-0	818701			1053616	64(100), 67(45), 40(25), 53(15), 81(10)
	9	4-Pyridinamine	10.3	79		504-24-5			797924	1145074	94(100), 67(40), 40(35), 53(10)
	10	2- Heptanone	10.54	79		110-43-0	1882830		8674944	2855575	43(100), 58(75), 71(15), 114(10)
	11	α-Pinene	10.85	91		80-56-8	137164634	119185423	74314748	94769143	93(100), 91(40), 119(30), 77(30), 79(20), 105(12)
	12	Styrene	11.24	91	Balsamic, plastic	100-42-5	838213	1463607	1513994	803525	104(100), 103(40), 78(40), 77(20), 51(15)
	13	Camphene	11.41	96		79-92-5	4150665	2706914	3054375	2635807	93(100), 121(80), 91(40), 79(35), 67(30), 136(20)
	14	Verbenene	11.69	63		4080-46-0			8826943	102332643	91(100), 92(40), 119(40), 117(20), 77(15), 105(10)
	15	5,7-Dimethylene-Bicyclo[2.2.2]Oct-2-ene	11.71	42		0-00-0	5859694	4406054			91(100), 92(50), 117(40), 132(40), 39(30)
	16	Hexanol	11.81	72	Green, apple skin, oily	111-27-3			4675757		56(100), 55(60), 43(50), 41(45), 69(40), 42(35), 84(10)
	17	β-Pinene	12.26	91		127-91-3	6713833	560 17453	39434632	42332643	93(100), 91(40), 119(30), 69(25), 41(25)
	18	Tert-Butyl benzene	12.35	71		98-06-6	3214991				119(100), 91(40), 117(30), 134(25), 115(20)
	19	Cymene	12.35	65		25155-15-1	3214991	4518046	1641125	2504448	119(100), 91(30), 134(20), 117(20)
	20	β-Myrcene	12.57	85	Woody, fruity, mango	123-35-3	4266227	1729852	2119445	2391077	93(100), 69(65), 41(60), 91(40),39(25), 77(20)
	21	2-pentyl Furan	12.93	86	Green, earthy, fruity	3777-69-3	29677453	16729957	27522563	26520986	81(100), 82(25), 138(20), 53(20
	22	3 Octanone	13.01	91	Mushroom, moldy	106-68-3				496492	43(100), 57(95), 99(80), 72(75), 71(60), 128(10), 85(10)
	23	Delta.3-Carene	13.08	94		13466-78-9	47205402	39443775	25043737	26453307	93(100), 119(60), 91(60), 77(30), 92(30)
	24	2,6,-Epoxy 5-hexenal	13.2	50		100-73-2				331712	83(100), 55(55), 112(50), 56(40), 41(20)
	25	Isocineole	13.33	67		470-67-7	1213632	1128905	1464269	779942	111(100), 43(88), 71(60), 119(60), 125(40), 154(35), 55(30)
	26	Benzene, 1-ethyl-2,3 dimethyl-	13.4	75		933-98-2	1098927			479478	119(100), 134(32), 91(25), 121(23), 95(20), 77(10)
	27	5-Hepten-2-one, 6-methyl-	13.53	76	Fatty, cheesy, green	110-93-0			1406687		43(100), 108(60), 41(50), 69(40), 55(40), 81(35), 111(25)
	28	dl-Limonene	13.74	96	citrus	138-86-3			45065459	42052538	68(100), 93(85), 67(75), 79(40), 121(30), 136(30), 53(20)
	29	β-Terpinyl acetate	13.76	86		10198-23-9	65972594	17785554			68(100), 93(85), 67(75), 79(40), 121(30), 136(30)
	30	β-Phellandrene	13.87	86		555-10-2	2031340	236160	868724		93(100), 91(40), 77(30), 136(25), 179(20), 121(10)
	31	α-Phellandrene	13.88	63	Terpenic, citrus	99-83-2				728729	93(100), 77(35), 92(25), 136(10)
	32	p-Cymene	13.96	95		99-87-6	63602649	28224311	51026999	44228101	119(100), 134(30), 91(20), 117(15)
	33	3-Heptene, 4-ethyl-	14.12	81		33933-74-3	2147996	960736	1066675	1096413	55(100), 97(80), 126(80), 69(70), 41(40), 84(30)
	34	2-Ethyl-5 methyl pyrazine	14.2	69	coffee	13360-64-0			566472	212219	121(100), 122(50), 70(30), 56(25), 94(10)
	35	1-Heptanol	14.27	76	Green, musty, banana	111-70-6			4632431		70(100), 56(85), 55(80), 41(80), 43(60), 69(60)
	36	2-Octene 1-ol	14.3	76		18409-17-1	12269976			7862743	57(100), 54(61), 67 (56), 41 (53), 55(43),
	37	Cymene	14.35	95		25155-15-1		761952			119(100), 91(35), 134(30), 117(20), 77(10)
	38	γ-Terpinene	14.55	86		99-85-4	3756334		2478555	2267649	93(100), 91(60), 136(40), 77(40), 105(20)
	39	Undecane, 5-methyl	14.84	67		1632-70-8		479958		638452	43(100), 57(95), 71(95), 85(55), 41(40), 55(40)
	40	1-Decanol, 2-ethyl-	14.92	79		21078-65-9	240477				57(100), 43(60), 69(60), 41(45), 83(30), 98(10)
	41	α-Humulene	15.27	69		6753-98-6	12746105		9749846	8315161	121(100), 93(98), 136(85), 91(60), 79(40), 77(35)
	42	1-Hexanol, 2-ethyl-	15.39	72		104-76-7	4946880	3825944	2370529	3864952	57(100), 41(45), 55(45), 70(30), 83(30), 112(20), 98(15)
	43	2-Nonanone	15.82	85		821-55-6				3685168	58(100), 43(85), 59(30), 71(25), 95(10), 84(10), 142(5)
	44	Dehydro-p-cymene	15.98	91		1195-32-0		326753		632002	132(100), 117(80), 115(50), 91(40), 92(30), 65(20)
	45	Fenchone	16.08	76		1195-79-5	2223645	2649396	2194636	1616312	81(100), 69(40), 41(20), 95(20), 119(15), 55(15), 152(10 )
	46	α-Pinene oxide	16.14	68		10359-41-8			1685446		108(100), 93(85), 95(80), 41(75), 81(70), 67(70), 91(50)
	47	3,4-Dimethylstyrene	16.21	84		27831-13-6				2909768	132(100), 117(90), 115(50), 91(40), 131(20)
	48	3-Heptyne, 5-methyl	16.28	63		61228-09-9			1416992		81(100), 110(30), 95(30), 55(25), 67(20), 69(15)
	49	1-Octanol	16.61	86	Mushroom, waxy, citrus	111-87-5			3495478		55(100), 56(90), 41(85), 70(65), 69(65), 84(50)
	50	Trans-3-caren-2-ol	16.68	58		6909-16-6			5083709	5101307	119(100), 119(95), 91(80), 134(30), 58(30), 71(20)
	51	Tert-Butylbenzene	16.69	67		98-06-6	4995236	3514552			119(100), 91(70), 43(43), 134(35), 77(30)
	52	Ethenyl cyclohexane	16.83	81		695-12-5	1520947	990132		719244	81(100), 67(50), 55(45), 95(45), 110(40), 41(35)
	53	Carveol	17.1	75		99-48-9	2299529		2800375		119(100), 91(75), 109(60), 81(50), 67(45), 137(40)
	54	2,3,3-Trimethyl-3-cyclopentene acetaldehyde	17.24	79		1686-14-2			2760349	2243354	108(100), 93(70), 95(35), 91(30), 67(25), 41(25),55(15)
	55	2-Norbornanone, 7,7 dimethyl	17.26	92		514-15-8	591348				69(100), 108(70), 41(50), 81(50), 93(50), 138(45)
	56	p-Cymene	17.55	67		99-87-6	2802470	2934660	6992395	6601273	119(100), 91(35), 134(30), 117(20), 77(10)
	57	(E,Z,Z)-2,4,7-Tridecatrienal	17.71	72		13552-96-0	2889665				81(100), 93(70), 80(60), 121(50), 41(40)
	58	Camphor	17.92	93		464-48-2	3248889	4883159	1936883	1609006	95(100), 81(90), 108(40), 152(35), 55(30), 69(30)
	59	1-Phenylethanol	18.09	58		98-85-1	1047097				107(100), 91(80), 105(70), 79(55), 77(50), 121(40), 122(20), 51(20)
	60	3-Pinanone	18.13	95		547-60-4	3162405	5191455	4156119	3885450	83(100), 55(75), 69(70), 41(40), 95(20), 152(15)
	61	4-Methyl-1-isopropylidenecyclohexane	18.22	79		1124-27-2	2784104		3598299	2418647	83(100), 95(95), 96(90), 55(70), 81(60), 67(55),109(30), 123(30)
	62	2(10)-Pinen-3-one	18.46	85		30460-92-5	11315321	2778835	8575178	4494605	81(100), 53(90), 108(85), 41(55), 107(50), 79(50)
	63	Isopinocamphone	18.59	95		15358-88-0	5355214	26235833		8939784	69(100), 83(99), 55(95), 41(60), 95(50), 119(20), 152(20), 110(20)
	64	Carveol	18.65	82		99-48-9	381717		14689550	6061636	91(100), 119(80), 92(50), 117(40), 134(40), 77(30)
	65	m-Cymene	18.79	61		535-77-3	1564770	979437	726657	961138	119(100), 93(60), 91(45), 134(30), 71(15)
	66	p-Cymene	18.85	71		99-87-6	27776470	12486310	14705132	16639537	119(100), 91(60), 134(30), 117(20), 77(15)
	67	Benzene, 1,2 dimethoxy-	19.21	88		91-16-7				614937	138(100), 95(40), 123(35), 77(30), 65(20),52(15)
	68	Cis-Dihydrocarvone	19.24	96		3792-53-8	1404057	983690	470226	791842	67(100), 95(85), 41(50), 81(50), 109(50), 55(40), 152(30)
	69	Myrtenal	19.38	95		564-94-3			6009991		79(100), 107(80), 91(45), 77(40), 108(40), 105(40), 135(20)
	70	Thymyl methyl ether	19.39	76		1076-56-8	7101888	391231		2199626	149(100), 79(40), 91(35), 164(30), 107(30), 119(15)
	71	Santolina epoxide	19.45	58		0-00-0			813954		95(100), 93(45), 79(35), 121(30), 41(25),107(20)
	72	Isoborneol	19.46	61		124-76-5	1478405	750160		1364502	95(100), 93(40), 67(35), 121(30), 110(20), 55(20)
	73	Anethole	19.52	94	fennel	104-46-1			3773795		148(80), 147(50), 117(30), 121(25), 133(15), 77(20)
	74	Methyl chavicol	19.55	95		140-67-0	3631260	1607613		4563716	148(100), 147(60), 73(50), 117(30), 121(25), 133(15)
	75	3-Carene	19.63	80		13466-78-9	6580819	1525966	5395383	9247061	93(100), 68(50), 121 (50), 136(50), 91(40), 59(40), 79(30)
	76	Verbanone	19.73	72		0-00-0				1378829	83(100), 95(90), 55(50), 109(45), 41(35), 67(30), 152(30)
	77	5-Decanone, 2-methyl-	19.75	76		54410-89-8			2289397	421835	43 (100), 71(95), 99(95), 58(85), 85(25)
	78	Amyl hexoate	19.96	86	Fruity	540-07-8			1548348	508723	70(100), 117(95), 43(85), 99(85), 55(50), 71(40), 42(40)
	79	2-Pinen-4-one	20.14	85		80-57-9	25969012	21122594	20470870	471119	107(100), 135(80), 91(70),150(55)
	80	p-Acetyl toluene	20.35	94		122-00-9	1139070		760534		119(100), 91(65), 134(35), 65(15)
	81	Carvyl acetate	20.49	65	Minty	97-42-7			4426706	6172163	91(100), 119(80), 79(60), 105(40), 133(40)
	82	Carvone	20.76	89	minty	2244-16-8			970566		82(100), 93(40), 108(30), 54(40), 91(25), 132(25), 150(10)
	83	Para cymenyl	20.87	94		1195-32-0		364243	765459	1097760	132(100), 117(80), 115(50), 91(40), 43(20), 65(15)
	84	Carvyl acetate	21.07	79	Minty	97-42-7		1414791	2969586	4278505	91(100), 119(80),117(45), 132(40), 92(40), 77(30)
	85	Para cymenyl	21.43	67		1195-32-0				319054	132(100), 117(90), 91(60), 115(50), 119(40), 134(35)
	86	Phenol	21.84	91		108-95-2	766422		4618433	857419	94(100), 66(30), 65(25), 55(10)
	87	Propoxy benzene	21.87	63		622-85-5				621851	94(100), 43(32), 66(33), 65(25), 113(15)
	88	Longicyclene	21.99	94		0-00-0				403995	94(100), 105(80), 119(70), 91(65), 133(60), 41(45)
	89	2 Butyl 2-octenal	22.1	94		13019-16-4			2280594		41(100), 55(98), 111(70), 83(70), 95(65), 139(60), 182(55
	90	Benzothiazole	22.56	91		95-16-9	2218128	1089224		3063282	135(100), 108(35), 69(15), 82(10), 97(5)
	91	Junipene	22.84	97		475-20-7	4016303	2614230	2280594	3949490	161(100), 91(80), 105(70), 189(50), 119(50)
	92	γ-Muurolen	23.19	93		30021-74-0		183094			161(100), 69(60), 93(40), 204(40), 55(30)
	93	β-Cedrene	23.41	88				201467			119(100), 105(60), 91(50), 55(45), 41(45), 204(40)
	94	Pentadecane	23.67	85		629-62-9	375522	237308		623928	57(100), 43(70), 71(60), 85(50), 97(20),
	95	5-Pentyl-2[5H]-furanone	24.57	68		21963-26-8			527821		84(100), 43(80), 55(75), 125(50), 97(25)
	96	1-Tetradecanol	24.88	94	Fruity, waxy	112-72-1			2765658	1988137	55(100), 69(80), 41(75), 56(70), 83(50), 57(50)
	98	Hexadecane	27.33	60		544-76-3	121500				57(100), 71(60), 43(50), 85(50), 97(25)
	* http://www.thegoodscentscompany.com/ & https://www.flavornet.org/

## Sheet: Table S3
Table S3: Summary of volatiles emitted on day zero from Carpet+Subflooring+caturine+ M. Leteus+ Product1, Carpet+Subflooring+caturine+ M. Luteus+ Product2, Carpet+Subflooring+caturine+ M. Leteus+ Product3, Carpet+Subflooring+caturine+ M. Leteus+ Product4.
	#	Volatile compounds	GC column Retention time (min)	MS Spectral Library (NIST & WILEY 7) match %	CAS #	Carpet+ sub-flooring+cat urine+M. luteus+ Product 1 (day 0)	Carpet+ sub-flooring+cat urine+M. luteus+ Product 2 (day 0)	Carpet+ sub-flooring+cat urine+M. luteus+ Product 3 (day0)	Carpet+ sub-flooring+cat urine+M. luteus+ Product 4 (day0)	Ion (% relative intensity)
						MS Detector response, peak area counts (PACs), arbitrary units
	1	Acetone	3.24	68	67-64-1	358744	380560	474903	430839	43(100), 58(30), 42(10), 39(5)
	2	2,4 Hexadienal	5.33	81	110-62-3	131308				81(100), 96(40), 53(30), 65(10)
	3	Pentanal	5.56	88	110-62-3	1354983	1653133	725418	1945524	44(100), 41(60), 58(50), 57(40), 43(30)
	4	Toluene	7.11	85	108-88-3	808174	893198		1315643	91(100), 92(60), 65(10), 51(5)
	5	Hexanal	8.06	95	66-25-1	24237673	29383184	11078995	15770078	56(100), 41(95), 44(90),57(70), 43(60), 39(40)
	6	Trans 2-Pentene	8.83	63	646-04-8				1139618	55(100), 70(90), 42(80), 41(50), 39(30), 43(20)
	7	1-Pentanol	9.37	72	71-41-0		6742800	6744690	9292407	55(100), 42(80), 41(75), 70(70), 39(35), 57(30)
	8	Pentane, 1-chloro	9.4	59	543-59-9	4209417				55(100), 42(90), 41(75), 71(60), 39(35), 57(30)
	9	2-Butylfurun	10.21	68	4466-24-4		1463055		1006109	81(100), 41(30), 55(30), 69(25), 124(25), 53(20)
	10	2- Heptanone	10.54	86	110-43-0	2818994	6796498	990983	5096800	43(100), 58(75), 71(15), 114(10)
	11	α-Pinene	10.8	91	80-56-8	16649718	46983540	9096994	25095633	93(100), 91(40), 92(35), 119(30), 77(30), 69(25), 41(25)
	12	1-Butanol, 3-methyl-, acetate	10.97	76	123-92-2			1560496		43(100), 70(55), 61(30), 55(30),42(25)
	13	Styrene	11.24	94	100-42-5	492374	892845			104(100), 103(40), 78(40), 77(20), 51(15)
	14	Camphene	11.41	94	79-92-5	555658	1598281		1031481	93(100), 121(80), 91(40), 79(35), 67(30), 136(20)
	15	Verbenene	11.7	58	4080-46-0		3532157	896386	1653240	91(100), 92(50), 119(35), 117(30), 132(20), 65(20), 105(105)
	16	1-Hexanol	11.83	68	111-27-3	2335021	4063349	722134	2249006	56(100), 55(70), 41(65), 43(50), 69(40),42(35), 84(15)
	17	β-Pinene	12.24	91	18172-67-3		12666288	2036835	7373110	93(100), 91(30), 41(25), 79(25), 69(25), 121(20)
	18	Decane	12.38	85	124-18-5			996054		57(100), 43(80), 71(40), 85(30), 41(30), 70(25), 119(20), 142(5)
	19	β-Myrcene	12.57	85	123-35-3	1852034	1123747	1269875	7848434	93(100), 69(65), 41(60), 91(40),39(25), 77(20)
	20	2-Pentyl furan	12.92	88	3777-69-3	18953874	31806740	8867857	20570954	81(100), 82(25), 138(20), 53(20
	21	2-Heptenal	13.04	88	57266-86-1	5861556	6039300	6881421	4162221	83(100), 55(80), 57(75), 56(70), 70(50), 43(45)
	22	Delta.3-Carene	13.07	88	13466-78-9	1605563	6542511	406638	3423210	93(100), 119(60), 91(60), 77(30), 92(30)
	232	2-Furancarboxaldehyde	13.18	94	98-01-1	3955091	10193373	4943365	9286643	96(100), 95(95), 39(40), 38(15), 37(10), 67(5)
	24	2-Octanone	13.26	88	111-13-7	1572246	969175	31821642		43(100), 58(90), 71(20), 85(10), 128(10)
	25	1,8-Cineole or Eucalyptol	13.32	54	470-82-6				2398083	111(100), 71(55), 125(50), 154(40), 55(40), 93(35), 119(25)
	26	6-methyl-5heptene-2-one	13.5	79	110-93-0				1463479	43(100), 69(70), 41(65), 55(50), 108(45), 126(20)
	27	Acetic acid, hexyl ester	13.58	72	142-92-7	34503919				43(100), 56(60), 84(30), 55(30), 60(30), 69(25)
	28	n-Octanal	13.58	93	124-13-0		12078560	2722145	3219552	43(100), 41(98), 57(90), 84(80), 55(70), 44(70), 69(25)
	29	Dl-Limonene	13.74	96	138-86-3	33991474	18152587	86643227	254330660	68(100), 93(80), 67(75), 79(40), 107(30), 121(30), 136(30)
	30	1,8-Cineole or Eucalyptol	13.9	96	470-82-6	8827786	1533543	107984088		43(100), 81(80), 93(70), 108(70), 154(60), 71(60)
	31	p-Cymene	13.96	91	99-87-6	1479623	16283022		4845129	119(100), 134(30), 91(20), 117(15)
	32	1-Octen-3-ol	14.35	63	3391-86-4			5840553	2529137	57(100), 54(55), 67(50), 81(40), 110(40)
	33	γ-Terpinene	14.61	95	99-85-4			2649145	1185613	93(100), 119(80), 91(60), 136(50), 77(40), 121(30), 92(25)
	34	3-Octen-2one	15.02	79	18402-82-9	935049	2985040		1835030	55(100), 43(50), 81(50), 111(50), 69(30), 95(30)
	35	Benzene, 1-methoxy-4methyl-	15.08	79	104-93-8			5401696		122(100), 121(40), 77(35), 91(30), 55(20), 65(10)
	36	1,3-Hexadiene, 3-ethyl-2-methyl-	15.1	71	61142-36-7	1098096	2063518		1708493	67(100), 95(60), 124(40), 109(30), 55(20), 41(20)
	37	Benzaldehyde	15.19	93	100-52-7	1788034	1163421	1148465	918265	106(100), 105(98), 77(80), 51(30), 78(15),50(15)
	38	p-Menth-3ene	15.29	50	20307-84-0	1453405	3133567		2970857	121(100), 93(90), 136(85), 91(80), 79(40)
	39	1-Hexanol, 2-ethyl	15.4	63	104-76-7		1544618		694575	57(100), 41(55), 54(50), 70(40), 83(30), 43(30), 81(30)
	40	4-Ethylcyclohexane	15.42	74	3742-42-5			877776		81(100), 41(50), 57(45), 55(30), 67(30), 110(30), 95(25)
	41	2-Octenal	15.58	89	2548-87-0	15261789	18998464	19490258	11411324	55(100), 70(99), 41(90), 83(80), 57(60)
	42	5-Methyl-2 furfural	15.73		620-02-0		806563			110(100), 109(85), 53(30), 34(5)
	43	Linalool oxide	15.8	63	5989-33-3				11306304	43(100), 59(90), 67(65), 81(65), 94(40), 111(30), 137(20)
	44	2-Nonanone	15.82		821-55-6		1082957	858506		58(100), 43(85), 59(30), 71(25), 95(10), 84(10), 142(5)
	45	3,7-Dimethyl-octa-1,6-diene	15.85	67	0-00-0	77125343				59(100), 67(90), 55(85), 95(75), 41(70), 82(60)
	46	4,7 dimethyl benzo-cyclopentanone	15.96	50	0-00-0		807775			132(100), 117(80), 115(50), 91(40), 92(30), 65(15)
	47	3-Octanol, 3,7 dimethyl or tetrahydro linalool	16.08	87	78-69-3				112696924	55(100), 70(95), 69(90), 73(80), 41(50), 140(40), 83(30)
	48	Trans-Rose oxide	16.1	63	876-18-6	6386432				139(100), 69(60), 41(40), 55(35), 81(30), 91(25), 107(20)
	49	1-Ethyl cyclohexene	16.12	?	1453-24-3			337872		81(100), 95(35), 69(30), 67(25), 41(25), 55(25),110(20),
	50	Nonanal	16.15	86	124-19-6	5467753	11349473	3661281		57(100), 41(75), 43(60), 56(60), 55(55), 98(40)
	51	Benzene, 1-methyl-4-(1-methylethenyl)	16.3	93	1195-32-0			754391		132(100), 117(90), 115(50), 91(30), 92(15)
	52	Cis-Rose oxide	16.49	71	876-17-5	943878				139(100), 69(60), 41(30), 55(30), 81(30), 121(20), 154(15)
	53	1-Octanol	16.61	86	111-87-5		3078474	2201332	2385057	55(100), 56(90), 41(85), 70(65), 69(65), 84(50)
	54	Delta -3-Carene	16.93	94	13466-78-9	146077699		1442111	12171360	93(100), 41(35), 91(35), 69(30), 121(30), 136(20)
	55	α-Pinene oxide	17.24		1686-14-2				4997634	108(100), 93(70), 95(35), 91(30), 67(25)
	56	Campholene aldehyde	17.25	81	26882-03-1	1714415	6693891			108(100), 93(75), 91(30), 41(25),67(20), 55(15), 77(15)
	57	2,3,3-Trimethyl-3-cyclopentene acetaldehyde	17.32	89	0-00-0			1543240		108(100), 93(70), 41(50), 55(45), 95(40), 67(30), 81(20)
	58	Dodecane	17.4	93	112-40-3			2807429		57(100), 43(65), 71(60), 85(40), 41(30)
	59	3-Nonen-2-one	17.44	88	14309-57-0		1603603		1287991	55(100), 43(60), 125(55), 97(30), 82(15)
	60	Citronella	17.52	92	106-23-0			17048730		69(100), 41(95), 55(90), 95(70), 121(70), 136(40), 154(20)
	61	p-Cymene	17.55	71	99-87-6	299215	1098148			119(100), 91(35), 134(30), 117(20), 77(10)
	62	1-Nonene	17.63	58	124-11-8	3297449		1124682		57(100), 56(75), 43(70), 41(70), 71(70), 55(60), 69(40)
	63	Pinanol	17.7	53	98510-89-5				1378236	43(100), 99(50), 71(40), 81(30), 41(30), 55(25)
	64	Camphor	17.92	95	464-48-2	17360380	635701	846448	936530	95(100), 81(90), 108(40), 152(35), 55(30), 69(30)
	65	2-Nonenal	17.99		18829-56-6			920851		43(100), 70(90), 41(85), 55(80), 83(65), 39(55), 96(40)
	66	3-Pinanone	18.12	74	15358-88-0	1021577	1507016		1268086	83(100), 55(75), 69(70), 41(40), 95(20), 152(15)
	67	2(10)-Pinen-3-one	18.46	85	30460-92-5	723583	1652802	1562183	1397057	81(100), 53(90), 108(85), 41(55), 107(50), 79(50)
	68	Decanal	18.53	94	112-31-2	1193118	741916		1110326	57(100), 43(90), 55(80), 41(70), 70(60), 82(50)
	69	Carveol	18.65	81	99-48-9	2322844			2649012	91(100), 119(80), 92(50), 117(40), 134(40), 77(30)
	70	Nonyl alcohol	18.85	86	143-08-8	32956540				56(100), 55(95), 70(80), 41(85), 69(70), 43(65)
	71	1-ethyl-2,3-dimethyl benzene	18.86	79	933-98-2		3807534		3364454	119(100), 91(70), 134(30), 117(25), 92(20)
	72	Menthyl acetate	18.95	81	2623-23-6		12483903			95(100), 81(95), 67(50), 71(45), 55(40), 123(40), 138(30)
	73	Camphene	19.09	85	79-92-5	800438		16776077		93(100), 95(65), 121(60), 79(40), 136(30), 67(30)
	74	Octanol, 2,7,dimethyl-	19.18	86	15250-22-3	2358771				56(100), 55(90), 70(85), 69(80), 57(70), 43(70), 41(50)
	75	Dihydro carvone	19.24	96	6909-25-7				917511	67(100), 95(80), 68(55), 82(50), 81(50), 109(40), 41(40)
	76	1,2 dimethyl cyclooctane	19.36	60	18486-69-6	2779512				55(100), 43(90), 57(80), 41(75), 71(70), 56(65)
	77	Myrtenal	19.39	95	564-94-3		2631765		2678730	79(100), 107(80), 91(50), 77(50), 108(40), 105(40), 41(30),
	78	Tetradecanol	19.44	54	464-45-9	9504922				55(100), 43(90), 57(80), 41(75), 71(70), 56(65)
	79	Borneol	19.46	74	10385-78-1		466780		194953	95(100), 93(40), 121(30), 110(20), 67(10)
	80	p-Allyl Anisole	19.54	95	140-67-0		1535233	1062224	1179699	148(100), 147(50), 117(30), 121(30), 133(20), 77(20), 91(20)
	81	Styrene	19.57	91	100-42-5	27214974				104(100), 103(45), 78(40), 122(20), 77(20), 51(20)
	82	Limonene	19.65	81	138-86-3	30536101	4167500	117188348	3356459	93(100), 121(60), 136(55), 68(50), 59(40), 91(40), 79(30)
	84	β-methoxystyrene	19.85	63	4747-15-3	11236785				91(100), 134(75), 75(55), 65(20), 135(20)
	85	Hexanoic acid pentyl ester	19.95	83	540-07-8		438911			70(100), 117(90), 99(85), 43(80), 55(50), 71(40)
	86	2-chloro-1,1,1 trifluoro-2 tridecene	19.99	74	108400-10-8			8689765		43(100), 56(90), 57(80), 69(70), 41(70), 54(65), 70(50)
	87	2-Pinen-4-one	20.14	81	80-57-9	3813550	6739646		7192564	107(100), 135(80), 91(70),150(55)
	88	Trans carane	20.3	95	18968-23-5		2849413			95(100), 81(80), 43(60), 67(45), 138(40), 55(40)
	89	β-Citronellol	20.41	94	106-22-9				7406625	69(100), 41(90), 95(70), 81(70), 67(65), 55(60), 123(35), 109(30)
	90	Carvone	20.76	67	99-49-0	1435568	40269496			82(100), 93(40), 108(30), 54(40), 91(25), 132(25)
	91	1-Decanol	20.97	88	112-30-1	28486057				55(100), 70(90), 56(90), 69(75), 83(70), 43(70), 41(60), 97(40)
	92	Carvyl acetate	21.08	74	97-42-7		1134716		894287	91(100), 119(70), 134(50), 92(40), 117(40), 77(30), 132(30)
	93	Benzeneethanol	21.11	91	60-12-8	2423801				91(100), 92(50), 122 (30), 65(15)
	94	1-Decanol, 2-methyl	21.35	79	18675-24-6	6838913				57(100), 55(90), 43(80), 69(70), 41(70), 56(50), 85(40)
	95	α-Terpinyl propionate	21.4	81	80-27-3				2193326	93(100), 69(50), 41(50), 91(45), 77(30), 119(20)
	96	1-Hexadecene	21.5	63	629-73-2	6546271			3163507	57(100), 55(95), 43(90), 69(75), 41(70), 85(50)
	97	Benzoic acid 2-hydroxy-methyl ester	20.53	95	119-36-8			189798603		120(100), 152(60), 92(50), 121(30), 65(20)
	98	Camphene	20.61	95	79-92-5			61128759		93(100), 95(65), 121(60), 79(40), 136(30), 67(30)
	99	1-Decanol	21.01	88	112-30-1			16572582		55(100), 70(90), 56(85), 69(75), 41(75), 43(75), 83(70)
	100	1-Chloro hexadecane	21.65	91	4860-03-01	1603395				69(100), 57(65), 41(60), 55(55), 43(50), 83(40), 97(40)
	101	Terpinol	21.89	85	10482-56-1	58004295				93(100), 121(60), 136(55), 68(50), 43(40), 79(40)
	102	Phenol	21.9	91	108-95-2				2612826	94(100), 66(30), 65(20), 39(15)
	103	1-Decanol 2-methyl	22.01	75	18675-24-6	9299518		8086487		57(100), 56(85), 43(85), 69(85), 41(80), 55(60)
	104	Decadienal	22.17	71	30551-18-9		1047492			81(100), 41(30), 67(20), 95(20), 55(15), 152(10)
	105	DELTA.3-Carene	22.46	94	2463-77-6	11059166			592084	93(100), 69(45), 41(45), 91(40), 79(35), 121(30), 136(20)
	106	Benzothiazole	22.56	69	95-16-9	946924	1244518		1615332	135(100), 108(35), 69(15), 82(10), 97(5)
	107	α-Damascone	22.72	85	24720-09-0	9359307				69(100), 123(25), 192(20), 81(20), 41(20)
	108	Isolongifolene	22.83	88	1135-66-6	1324368	943023	1432079	1293933	161(100), 189(60), 94(55), 105(50), 119(50), 133(50)
	109	Tetradecanol	22.97	93	112-72-1	16228395		96056454		55(100), 69(85), 41(80), 43(75), 56(75), 70(75)
	110	2-Propanol, 1-phenoxy	23.67	88	770-35-4	212698			141591827	94(100), 77(30), 152(25),108(20), 111(20)
	111	1-Propanol, 2-phenoxy	23.85	88	4169-04-04				25040386	94(100), 77(20), 152(20), 121(10)
	112	Dihydro-nor-dicyclo-pentadienyl actate	24.18	85	0-00-0	135209597				66(100), 117(40), 132(37), 43(37), 91(30), 124(20)
	113	Acetic acid dodecyl ester	24.62	83	112-66-3			39936211		43(100), 55(60), 69(60), 83(50), 97(40)
	114	p-Cymene	24.63	68	99-87-6	8845524				119(100), 91(20), 117(10), 120 (10), 77(5)
	115	Phenylether	24.73	85	101-84-8	3158585				170(100), 141(40), 142(35), 77(30), 169(25), 51(25), 115(10)
	116	Cyclododecane	24.88	95	294-62-2	4152871	5917133	2611300	9229827	55(100), 69(80), 41(75), 43 (75), 56(75), 83(70) , 57(50)
	117	9-Octadecene	25.24	91	7206-25-9			1292601		55(100), 57(99), 43(80), 56(80), 69(70)
	118	(E) β-lonone	25.11	95	79-77-6	9469983				177(100), 43(40), 91(20), 135(10), 178(10)
	119	Butylphenol, 4-methyl-2,6-di-tert-	25.11	95	128-37-0				78232497	205(100), 220(25), 206(20), 57(15), 145(10)
	120	Diemthyl anthranilate	25.28	91	85-91-6	742199				165(100), 104(70), 105(60), 132(45), 77(35, 134(20)
	121	Phenol,2-methoxy-4-(2-propenyl)-acetate	25.42	83	93-28-7			8132859		164(100), 149(35), 131(30), 103(30), 77(30), 91(25), 55(25)
	122	1-Hexadecane	25.55	95	544-76-3	637741			1771164	57(100), 43(70), 71(65), 85(50), 41(35), 55(30)
	123	Isoamyl phenylacetate	25.58	95	102-19-2			5973700		91(100), 43(70), 70(50), 136(30), 55(20)
	124	Decyl ether	25.79	86	2456-28-2	1491874				43(100), 57(98), 56 (80), 41(70), 71(65), 85(50), 97(30), 112(20)
	125	Octadecyl vinyl ether	25.85	88	930-02-9			2505961		57(100), 43(90), 55(75), 41(70), 71(50), 70(50)
	126	Lily aldehydes	26.32	96	80-54-6	18616667				189(100), 147(40), 131(30), 204(20), 117(20), 91(20)
	127	Isoamyl salicylate	26.47	79	87-20-7			41986378		120(100), 138(40), 121(30), 208(20),92(20)
	128	Naphthalene, 2-methoxy	26.65	94	93-04-9	1189851				158(100), 115(90), 128(20), 143(10),89(5), 63(5)
	129	Amy salicylate	27.32	95	2050-08-0			53132975		120(100), 138(35), 121(30), 208(20), 92(20)
	130	Stearyl vinyl ether	27.65	92	930-02-9			3184069		57(100), 43(80), 55(65), 41(60), 71(50), 69(45)
	131	Methyl β-ionone	28.25	75	127-43-5	29777988				191(100), 119(40), 43(30), 109(30), 95(25), 135(20), 173(20)
	132	Benzophenone	30.42	95	119-61-9	365310	1081370			105(100), 77(60), 182(60), 51(20), 181(10), 106(5), 183(5)
	133	α-Hexylcinnamic aldehyde	30.5	97	101-86-0	2990251				129(100), 115(70), 91(65), 117(65), 145(50), 216(40)

## Sheet: Table S4
Table S4: Summary of volatiles emitted on day 15 from Carpet+Subflooring+caturine+ M. Leteus+ Product1, Carpet+Subflooring+caturine+ M. Luteus+ Product2, Carpet+Subflooring+caturine+ M. Leteus+ Product3, Carpet+Subflooring+caturine+ M. Leteus+ Product4
	#	volatile compounds	GC column Retention time (min)	MS Spectral Library (NIST & WILEY 7) match %	CAS #	Carpet+ sub-flooring+cat urine+M. luteus+ Product 1 (day 15)	Carpet+ sub-flooring+cat urine+M. luteus+ Product 2 (day 15)	Carpet+ sub-flooring+cat urine+M. luteus+ Product 3 (day15)	Carpet+ sub-flooring+cat urine+M. luteus+ Product 4 (day15)	Ion (% relative intensity)
						MS Detector response, peak area counts (PACs), arbitrary units
	1	Acetone	3.19	63	67-64-1			643351	332952	43(100), 58(30), 34(5)
	2	Acetic acid methyl ester	3.34	63	79-20-9		196721	4500806		43(100), 74(30), 59(10)
	3	2-Pentanone	5.39	79	107-87-9				1981899	43(100), 86(20), 58(15), 71(10)
	4	1-Hexene 4-methyl	8.52	63	3769-23-1			2200691		41(100), 57(90), 56(80), 55(70), 70(60), 39(40), 58(20)
	5	1-Pentanol	9.4	63	71-41-0			2211532		55(100), 42(80), 41(75), 70(60), 39(40)
	6	2-Butylfuran	10.33	85	4466-24-4		832292			81(100), 124(25), 82(20), 53(10)
	7	Methyl pyrazine	10.32	76	109-08-0	874537			1435565	94(100), 67(40), 39(15), 53(10)
	8	2-Heptanone	10.56	83	110-43-0	1452480		6756435	1881383	43(100), 58(70), 71(20), 114(10)
	9	α-Pinene	10.84	89	80-56-8	99017729	94473919	61479562	57686178	93(100), 119(60), 91(50), 92(40), 77(30), 79(20), 134(20)
	10	Styrene	11.25	95	100-42-5	1324148	966762	4458613	1322208	104(100), 103(50), 78(45), 77(20), 51(20)
	11	Camphene	11.42	95	79-92-5	2001325	1807294		1933728	93(100), 121(80), 91(40), 79(35), 67(30), 136(20)
	12	Verbenene	11.72	53	4080-46-0	3218321	6737442	5177868	2561949	91(100), 92(50), 119(20), 105(10), 65(10)
	13	Beta Pinene	12.26	88	127-91-3	52069404	43657936	24138507	30120486	93(100), 91(40), 119(30), 69(25), 41(25)
	14	Cymene	12.34	76	25155-15-1	1633732	1981248	3797373	1251275	119(100), 91(30), 134(20), 117(20)
	15	β-Myrcene	12.57	79	123-35-3	3986174	2296684	3230305	2797983	93(100), 69(65), 41(60), 91(40),39(25), 77(20)
	16	2-Pentyl furan	12.92	86	3777-69-3	40411723	58123433	42914226	30399899	81(100), 82(25), 138(20), 53(20
	17	Octanone-3-one	13.01	93	106-68-3		2423046	2481371		43(100), 57(98), 99(80), 72(70), 71(60), 85(10), 128(10)
	18	Delta.3-Carene	13.07		13466-78-9	37311278	27366604	13780660	22956326	93(100), 119(60), 91(60), 77(30), 92(30)
	19	2-Octanone	13.29	88	111-13-7			51150216		43(100), 58(95), 71(20), 85(10), 128(10)
	20	Eucalyptol	13.34	50	470-82-6		944451		2925810	111(100), 125(50), 154(30)
	21	6-Methyl-5-Hepten-2-one	13.53	65	110-93-0	1299491		1493532	1769012	43(100), 69(70), 55(60),41(55), 108(50), 83(40)
	22	β-Terpinyl acetate	13.74	76	10198-23-9	47899813	30573508			68(100), 93(90), 79(40), 107(30), 121(30), 136(30)
	23	Limonene	13.78	96	138-86-3			123454691	163287713	68(100), 93(95), 67(70), 79(50), 121(40), 136(40), 107(30)
	24	Beta-Phellandrene	13.87	76	555-10-2	1957192	1238840			93(100), 77(32), 91(30), 136(30)
	25	p-Cymene	13.96	95	99-87-6	19827787	41140670	110965346	39469757	119(100), 134(30), 91(20), 117(15)
	26	4-ethyl cyclohexanone	14.11	78	5441-51-0	1711268	6278911			54(100), 97(50), 126(50), 84(20)
	27	3-ethyl cyclohexanone	14.12	83	22461-89-8			1441626	2014833	55(100), 97(90), 69(80), 126(80), 70(40)
	28	2 Octene 1-ol	14.3	78	18409-17-1	13367302	17602662	37507482	14580915	57(100), 54(61), 67 (56), 41 (53), 55(43),
	29	Methyl para cresol	15.05	95	104-93-8			9096931		122(100), 121(50), 77(40), 107(40), 91(25)
	30	Askaridol	15.3	71	512-85-6	7263626			8052591	79(100), 91(98), 121(90), 136(80), 117(70)
	31	2-ethyl 1-Hexanol	15.4	68	104-76-7		2548302		1622111	57(100), 41(55), 55(50), 70(30), 83(30), 56(30)
	32	5-Methyl-2 furfural	15.73		620-02-0					110(100), 109(85), 53(30), 34(5)
	33	Linalool oxide	15.8	50	5989-33-3				2454082	43(100), 59(70), 67(50), 81(50), 41(50), 94(40), 93(40)
	34	2-Nonanone	15.82		821-55-6			16377169		58(100), 43(85), 59(30), 71(25), 95(10), 84(10), 142(5)
	35	1,6-Octadiene, 3,7-dimethyl-	15.85	79	2436-90-0	80037684				67(100), 55(95), 59(90), 95(80), 41(75), 82(70),123(40)
	36	3-Octanol, 3,7-dimethyl	16.09	84	78-69-3				81716183	55(100), 70(95), 69(90), 73(70), 83(30)
	37	Trans-Rose oxide	16.09	67	876-18-6	5485774				139(100), 81(98), 69(80), 45(41), 55(40)
	38	4,4-Dimethyl-2hexyne	16.1	75	0-00-0			3523333		81(100), 69(30), 95(25), 41(22), 55(20), 110(20)
	39	1-Ethyl cyclohexene	16.12	72	1453-24-3		4841330			81(100), 95(35), 69(30), 67(25), 41(25), 55(25),110(20),
	40	p-Cymenene	16.21	85	1195-32-0		3625757			132(100), 117(90),115(50), 91(30), 92(20), 65(12), 51(10)
	41	3-Heptyne, 5-methyl	16.28	68	61228-09-9		1214622			81(100), 110(30), 95(30), 55(25), 67(20), 69(15)
	42	1-Octanol	16.61	83	111-87-5			1369715		55(100), 56(90), 41(85), 70(65), 69(65), 84(50)
	43	Carveol	16.7	72	99-48-9	5480180	5034251	4506043	4215985	119(100), 43(85), 91(70), 134(30), 117(30), 92(25)
	44	Cyclohexane, ethenyl	16.85	81	695-12-5		1686574	937769		81(100), 67(50), 95(40), 55(38), 110(35), 41(28)
	45	3-Carene	16.91	79	13466-78-9	131430167		1422682	8208054	93(100), 119(50), 91(45), 41(40), 77(30), 136(20)
	46	α-Pinene oxide	17.24	54	1686-14-2		1147947	1033089		108(100), 93(70), 95(35), 91(30), 67(25)
	47	Campholenal	17.25	68	4501-58-0	723477				108(100), 93(75), 41(30),67(20)
	48	Dodecane	17.34	85	112-40-3			4100934		57(100), 43(70), 71(60), 55(50), 41(40), 56(30), 85(30)
	49	p-Cymene	17.55	67	99-87-6	2967932	3671391	5675439	3292237	119(100), 91(35), 134(30), 117(20), 77(10)
	50	1,2,3-trimethyl cyclohexane	17.64	63	1678-97-3	1526884				55(100), 70(80), 57(60), 71(60), 41(60), 43(50), 97(40), 83(30)
	51	3-Dodecene	17.79	54	7239-23-8	7808285				57(100), 56(90), 43(85), 41(85), 69(75), 55(75), 71(70), 105(40)
	52	Camphor	17.92	93	464-48-2	14337121	3677213	6528188	2756099	95(100), 81(90), 108(40), 152(35), 55(30), 69(30)
	53	3-Pinanone	18.12	93	15358-88-0	3605261	5260257	4274372	3979099	83(100), 55(75), 69(70), 41(40), 95(20), 152(15)
	54	2(10)-Pinen-3-one or Pinocarvone	18.46	93	30460-92-5	5837364	3756193	8881193	4061460	81(100), 53(90), 108(85), 41(55), 107(50), 79(50)
	55	3-Pinanone	18.6	95	15358-88-0	1167476	4851924		3088695	83(100), 55(99), 69(98), 41(60), 95(50), 119(30)
	56	Carveol	18.65	80	99-48-9	6499374	6611451	14580650	6031602	91(100), 119(80), 92(50), 117(40), 134(40), 77(30)
	57	m-Cymene	18.79	50	535-77-3	2023892	967774		2066235	119(100), 93(60), 91(45), 134(30), 71(15)
	58	p-Cymene	18.85	80	99-87-6	15151332	12934383	28541509	15046376	119(100), 91(60), 134(30), 117(20), 77(15)
	59	Levomenthol	18.95	72	2216-51-5		1641637			95(100), 81(98), 67(60), 55(50), 71(40), 123(40), 138(40)
	60	Camphene	19.1	94	79-92-5	1247763		21486930		93(100), 95(75), 121(70), 79(40), 67(30), 107(30), 136(30)
	61	Dihydrocarvone	19.25	95	6909-25-7		5128870		1243649	67(100), 95(85), 68(55),109(50), 81(50), 55(40)
	62	5-Decene	19.37	60	19689-19-1	1777081				55(100), 43(70), 69(65), 41(65), 56(65), 57(60), 70(45)
	63	Myrtenal	19.39	86	18486-69-6		1588066		2264809	79(100), 107(80), 91(60), 77(55), 105(50), 41(30)
	64	CItronellal	19.45	72	106-23-0	8771340				55(100), 41(75), 43(70), 69(60), 95(60), 56(50)
	65	Borneol L	19.46	53	464-45-9		831969			95(100), 93(50), 212(25), 110(20), 136(15)
	66	Methyl chavicol	19.55	95	140-67-0		5057763	3975268	2654342	60(100), 148(80), 73(50), 117(30), 121(25), 133(15)
	67	Styrene	19.57	91	100-42-5	8934007				104(100), 103(40), 78(40), 77(20), 51(20)
	68	Terpinyl ester of isobutanoic acid	19.63	65	7774-65-4	37765127	4106536			93(100), 119(60), 68(50), 121 (50), 136(50), 91(40)
	69	Terpineol	19.64	82	98-55-5			15588467	9867201	93(100), 119(60), 68(50), 136(50), 91(45), 121(45)
	70	5 Decanone, 2methyl	19.75	81	927-49-1		1473016			43(100), 71(90), 99(90), 58(70), 41 (30), 85(25)
	71	β-Methoxystyrene	19.86	63	4747-15-3	6562925				91(100), 134(70), 75(50), 65(20)
	72	Dihydrocarvyl acetate	19.91	88	38049-26-2		1261389			93(100), 107(70), 79(70), 121(60), 136(50), 68(50), 67(48)
	73	2-Pinen-4-one	20.14	85	80-57-9	18049178	22784524	26542432		107(100), 135(80), 91(70),150(55)
	74	Carvyl acetate	20.51		97-42-7		5070022			91(100), 119(80), 79(60), 105(40), 133(40)
	75	Methyl salicylate	20.5	88	119-36-8			226098158		120(100), 92(50), 152(50), 121(45), 93(30)
	76	Levomenthol	20.41	79	2216-51-5	54674035				57(100), 123(98), 81(90), 82(85), 67(70), 95(50), 41(50)
	77	Carvol	20.78	79	99-49-0		2068209			82(100), 93(40), 108(30), 54(40), 91(25), 132(25)
	78	Cyclodecane	20.97	91	293-96-9	4306231		3058100		55(100), 70(80), 56(80), 41(75), 43(70), 69(70), 83(50)
	79	Carvyl acetate	21.07	58	97-42-7	3402491		5576801		91(100), 119(80),117(45), 132(40), 92(40), 77(30)
	80	Cyclopropane, 1,2-dibutyl	21.36	88	41977-32-6	3593739		13928195		55(100), 57(85), 69(80), 43(75), 56(75), 97(30), 154(30)
	81	5-Undecene	21.5	71	4941-53-1	3104913		10088180		55(100), 57(80), 69(75), 43(70), 56(65), 84(40), 111(40)
	82	Tetradecane	21.69	94	629-59-4					57(100), 43(98), 71(70), 85(45), 41(40), 55(35)
	83	Phenyl acetate	21.88	58	122-79-2			18143310		94(100), 55(50), 43(40), 70(40)
	84	Dihydrocarveol	21.89	68	38049-26-2	24032601				93(100), 94(60), 121(60), 68(60), 136(50), 43(40), 67(40)
	85	5-methyldecene	22.02	76	54244-79-0			17642681		55(100), 56(98), 69(90), 43(80), 41(75), 83(40), 97(30),
	86	α-Gurjunene	22.1	71	489-40-7		551663			107(100), 119(90), 91(80), 161(60), 189(50), 204(45), 133(45)
	87	Linalyl acetate	22.47	50	115-95-7	1222067				93(100), 41(70), 69(70), 91(60), 119(50), 43(50), 77(35)
	88	Benzothiazole	22.56	91	95-16-9	1566088	2449312	2829924	18883717	135(100), 108(35), 69(15), 82(10), 97(5)
	89	α-Damascone	22.73	79	43052-87-5	1822784				69(100), 123(25), 192(25), 81(20), 41(20)
	90	Junipene	22.84	96	475-20-7	3307481	2616205	4384639	2688414	161(100), 91(80), 105(70), 189(50), 119(50)
	91	1-Undecanol	22.98	88	112-42-5	5526363		26482085		55(100), 69(85), 41(80), 56(75), 70(75), 83(60), 97(40)
	92	1-Phenoxy 2-Propanol	23.43	85	770-35-4				114623091	94(100), 77(30), 152(25), 108(20)
	93	Pentadecane	23.69	93	629-62-9	339202	407577			57(100), 43(70), 71(60), 85(40), 41(40)
	94	Dicyclopentadiene	24.17	71	77-73-6	32189979				66(100), 117(30), 132(30), 43(30), 91(25),67(25)
	95	Diphenyl ether	24.74	86	101-84-8	913803				170(100), 141(50), 77(30), 51(20), 142(20)
	96	Cyclododecan	24.88	93	112-72-1	3375737	3375690	3656523	6971530	55(100), 69(80), 41(75), 56(70), 83(50), 57(50), 168(20)
	97	Butylated Hydroxyltoluene	25.11	89	128-37-0				6097302	205(100), 161(40), 220(25), 203(25), 57(20)
	98	β-Ionone	25.12	93	79-77-6	1887346				177(100), 43(40), 91(20), 135(15)
	99	Eugenol	25.4	96	97-53-0			2925172		164(100), 149(40), 131(35), 103(35), 77(30), 55(30), 91(25)
	100	Lily aldehyde	26.33	95	80-54-6	1236409				189(100), 147(40), 131(30), 204(25), 91(20)
	101	2-Methoxy Naphthalene	26.65	95	93-04-9	433388				158(100), 115(90), 128(15), 143(10)
	102	Isoamyl salicylate	27.26	91	87-20-7			3907630		120(100), 138(40), 121(35), 55(20), 70(20), 92(20), 208(15)
	103	Eicosane	27.33	58	112-95-8		325201			57(100), 43(70), 71(65), 41(50), 85(40), 69(30)
	104	α-Hexylcinnamic aldehyde	30.51	97	101-86-0	1035562				129(100), 115(70), 91(70), 117(50), 145(40), 216(40)
